# Supplementary material
Source: Springer Nature journal article supplement (https://www.springermedizin.de/resource/supplementary/12906_2008_215_MOESM4_ESM.pdf/9524294)

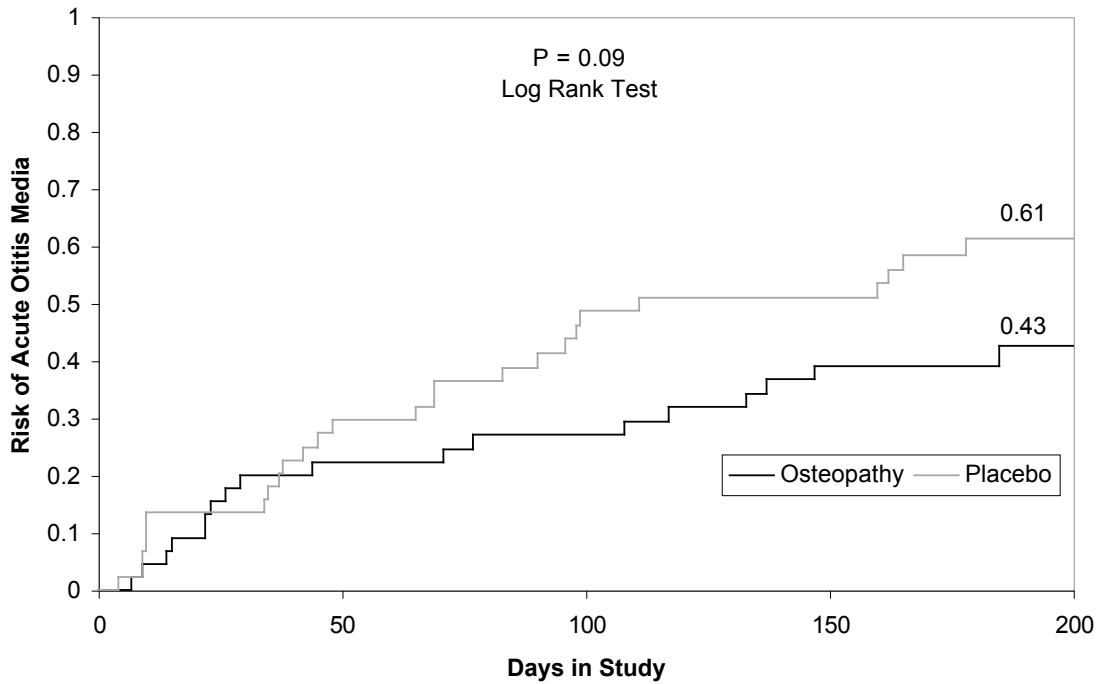

**No. at Risk**

|         |    |    |    |    |   |
|---------|----|----|----|----|---|
| OMT     | 46 | 34 | 30 | 24 | 9 |
| Placebo | 44 | 31 | 21 | 20 | 3 |

Supplement: MOESM4 [file 9524294]
